# Supplementary material for: Formal synthesis of (−)-agelastatin A: an iron(II)-mediated cyclization strategy
Source: publisher site journal article supplement (doi:10.3762/bjoc.9.99), 2013-05-03
Supplement: Additional file 1 [file 1860-5397-9-99-S1.pdf]

# Supporting Information

## for

### Formal synthesis of (–)-agelastatin A: an iron(II)-mediated cyclization strategy

Daisuke Shigeoka, Takuma Kamon and Takehiko Yoshimitsu\*

Address: Graduate School of Pharmaceutical Sciences, Osaka University, 1-6 Yamadaoka, Suita, Osaka 565-0871, Japan

Email: Takehiko Yoshimitsu\* - yoshimit@phs.osaka-u.ac.jp

\* Corresponding author

### Experimental procedures, characterization data of new compounds, and $^1\text{H}/^{13}\text{C}$ NMR spectra

#### Table of Contents

|                                                                                            |     |
|--------------------------------------------------------------------------------------------|-----|
| General.....                                                                               | S3  |
| Preparation of <i>N</i> -hydroxycarbamate <b>7</b> .....                                   | S3  |
| Preparation of <i>N</i> -tosyloxycarbamate <b>8</b> .....                                  | S4  |
| Table 1, entry 4 .....                                                                     | S4  |
| Table 1, entry 1 .....                                                                     | S5  |
| Table 1, entry 2 .....                                                                     | S6  |
| Table 1, entries 3–6 .....                                                                 | S7  |
| Table 1, entry 7 .....                                                                     | S8  |
| Aminobromination of azidoformate <b>3</b> with $\text{FeBr}_2/\text{Bu}_4\text{NBr}$ ..... | S9  |
| Reaction of enone <b>10</b> with $\text{TMSCl}$ in $\text{EtOH}$ .....                     | S9  |
| References .....                                                                           | S10 |

**Copies of  $^1\text{H}$  NMR/ $^{13}\text{C}$  NMR spectra**

|                                                                                                        |         |
|--------------------------------------------------------------------------------------------------------|---------|
| $^1\text{H}$ NMR/ $^{13}\text{C}$ NMR spectra of compound <b>7</b> .....                               | S11/S12 |
| $^1\text{H}$ NMR/ $^{13}\text{C}$ NMR spectra of compound <b>8</b> .....                               | S13/S14 |
| $^1\text{H}$ NMR/ $^{13}\text{C}$ NMR spectra of compound <b>11</b> .....                              | S15/S16 |
| $^1\text{H}$ NMR/ $^{13}\text{C}$ NMR spectra of compound <b>12</b> .....                              | S17/S18 |
| $^1\text{H}$ NMR Spectra of a mixture of compound <b>5b</b> , <b>9</b> , and <b>10</b> (entry 2) ..... | S19/S20 |
| $^1\text{H}$ NMR Spectra of a mixture of compound <b>5a</b> , <b>9</b> , and <b>10</b> (entry 3).....  | S21/S22 |
| $^1\text{H}$ NMR Spectra of a mixture of compound <b>5a</b> , <b>9</b> , and <b>10</b> (entry 5).....  | S23/S24 |
| $^1\text{H}$ NMR Spectra of a mixture of compound <b>5b</b> , <b>9</b> , and <b>10</b> (entry 6) ..... | S25/S26 |
| $^1\text{H}$ NMR Spectra of a mixture of compound <b>5b</b> and <b>12</b> (entry 7).....               | S27/S28 |

**General.** Melting points are uncorrected. All reagents were used as received from commercial suppliers unless otherwise noted.  $^1\text{H}$  NMR spectra (400 MHz) and  $^{13}\text{C}$  NMR spectra (100 MHz) were measured in the specified solvents. Chemical shifts are reported in ppm relative to the internal solvent signal [chloroform-*d*: 7.26 ppm ( $^1\text{H}$  NMR), 77. ppm ( $^{13}\text{C}$  NMR); methanol-*d*: 3.30 ppm ( $^1\text{H}$  NMR), 49.0 ppm ( $^{13}\text{C}$  NMR); DMSO-*d*<sub>6</sub>: 2.49 ppm ( $^1\text{H}$  NMR), 39.5 ppm ( $^{13}\text{C}$  NMR)]. FTIR spectra were recorded for samples loaded as neat films on NaCl plates or dispersed in KBr pellets. Mass spectra were obtained according to the specified technique. Analytical thin layer chromatography (TLC) was performed using Kieselgel 60 F<sub>254</sub>. Compounds were visualized with UV light and stained with anisaldehyde solution or phosphomolybdic acid solution.

**Preparation of *N*-tosyloxycarbamate **8** from alcohol (+)-**6**:**

**Preparation of *N*-hydroxycarbamate **7**:** To a stirred solution of alcohol (+)-**6** [1] (300 mg, 1.56 mmol) in THF (14 mL) was added CDI (303 mg, 1.87 mmol). After 4.5 h at room temperature, TLC analysis indicated complete conversion of the starting material into the corresponding imidazolidine. To this mixture was added hydroxylamine hydrochloric acid salt (302 mg, 4.68 mmol), and stirring was continued for an additional 23.5 h at room temperature. The reaction mixture was then poured into a separatory funnel where it was partitioned between EtOAc and H<sub>2</sub>O. The organic layer was separated, dried over MgSO<sub>4</sub>, filtered, and concentrated under reduced pressure. The residue was purified by flash silica gel column chromatography (EtOAc → MeOH/EtOAc 1:30 v/v) to afford *N*-hydroxycarbamate **7** (255 mg, 67%) as a colorless solid.  $[\alpha]_{\text{D}}^{22} +105.3$  (*c* 0.485, MeOH); IR (KBr)  $\nu$  3464, 3246, 1718, 1647 cm<sup>-1</sup>;  $^1\text{H}$  NMR (400 MHz, CD<sub>3</sub>OD)  $\delta$  6.91-6.77 (m, 2H), 6.50 (m, 1H), 6.27-6.16 (m, 2H), 6.09 (m, 1H), 5.79 (m, 1H), 2.51 (ddd, 1H, *J* = 15.2, 8.0, 2.4 Hz), 2.09 (ddd, 1H, *J* = 14.4, 7.6, 2.0 Hz);  $^{13}\text{C}$  NMR (100 MHz, CD<sub>3</sub>OD)  $\delta$  166.6, 160.5, 138.4, 134.9, 125.9, 124.2, 115.6, 109.2, 80.9, 63.1, 41.5; MS *m/z*: 251 (*M*<sup>+</sup>), 174 (100%); HRMS–EI (*m/z*): [*M*]<sup>+</sup> calcd for C<sub>11</sub>H<sub>13</sub>N<sub>3</sub>O<sub>4</sub>, 251.0906; found, 251.0922.

**Preparation of *N*-tosyloxycarbamate **8**:** To a solution of *N*-hydroxycarbamate **7** (228 mg, 0.908 mmol) in THF (12.5 mL) at 0 °C were added Et<sub>3</sub>N (190 µL, 1.36 mmol) and TsCl (190 mg, 0.998 mmol), and the mixture was warmed to room temperature. After being stirred for 30 min at room temperature, the mixture was poured into a separatory funnel where it was partitioned between EtOAc and H<sub>2</sub>O. The phases were separated and the aqueous phase was extracted with EtOAc. The combined organic extracts were dried over MgSO<sub>4</sub>, filtered, and concentrated under reduced pressure. The residue was purified by flash silica gel column chromatography (EtOAc/*n*-hexane 2:1 v/v) to afford *N*-tosyloxycarbamate **8** (341 mg, 92%) as a colorless solid.  $[\alpha]_D^{20} +71.6$  (*c* 0.485, CHCl<sub>3</sub>); IR (neat)  $\nu$  3468, 3374, 2926, 1761, 1645 cm<sup>-1</sup>; <sup>1</sup>H NMR (400 MHz, CDCl<sub>3</sub>)  $\delta$  9.37 (brs, 1H), 7.89 (d, 2H, *J* = 8.2 Hz), 7.37 (d, 2H, *J* = 8.7 Hz), 6.75-6.61 (m, 2H), 6.42 (m, 1H), 6.19-6.06 (m, 2H), 6.03 (m, 1H), 5.92-5.52 (m, 3H), 2.46 (s, 3H), 2.36 (ddd, 1H, *J* = 15.1, 7.8, 2.7 Hz), 2.04 (ddd, 1H, *J* = 15.1, 7.3, 4.1 Hz), <sup>13</sup>C NMR (100 MHz, CDCl<sub>3</sub>)  $\delta$  163.6, 155.4, 146.1, 137.4, 133.4, 130.3, 129.7, 129.6, 124.0, 123.3, 114.0, 108.3, 81.2, 61.8, 39.8, 21.8; MS *m/z*: 406 (MH<sup>+</sup>), 154 (100%); HRMS–FAB [*M* + H]<sup>+</sup> calcd for C<sub>18</sub>H<sub>20</sub>N<sub>3</sub>O<sub>6</sub>S, 406.1073; found, 406.1073.

#### **Protocols for aminohalogenation of *N*-tosyloxycarbamate **8** with FeX<sub>2</sub>/Bu<sub>4</sub>NX:**

##### **Table 1, entry 4**

To a solution of *N*-tosyloxycarbamate **8** (20 mg, 0.049 mmol) in *t*-BuOH (1 mL) were added Bu<sub>4</sub>NCl (16.4 mg, 0.059 mmol) and FeCl<sub>2</sub> (3.2 mg, 0.025 mmol). The mixture was warmed to 28 °C in a water bath and sonicated for ca. 1 min to dissolve all the reagents. After being stirred for 2.5 h at the same temperature, the mixture was poured into a separatory funnel where it was partitioned between EtOAc and H<sub>2</sub>O. The phases were separated, and the aqueous phase was extracted with EtOAc. The combined organic extracts were dried over MgSO<sub>4</sub>, filtered, and concentrated under reduced pressure. The residue was purified by flash silica gel column chromatography (EtOAc/*n*-hexane 2:1→3:1→EtOAc v/v) to afford chloride **5b** (6.3 mg, 48%) carbamate **9** (1.2 mg, 9%), and enone **10** (0.9 mg, 9%), all as colorless solids. **Chloride 5b**: IR (KBr)  $\nu$  3339, 2928, 1746, 1653 cm<sup>-1</sup>; <sup>1</sup>H NMR (400 MHz, CD<sub>3</sub>OD)  $\delta$  7.15 (dd, 1H, *J* = 2.8, 1.8 Hz), 6.81 (dd, 1H, *J* = 3.7, 1.8 Hz), 6.19 (dd, 1H, *J* = 3.7, 2.8 Hz), 5.92 (ddd, 1H, *J* = 11.5, 11.4,

6.9 Hz), 5.15 (t, 1H,  $J = 6.9$  Hz), 4.55 (dd, 1H,  $J = 11.5, 6.0$  Hz), 4.46 (m, 1H), 2.54 (dd, 1H,  $J = 14.7, 6.9$  Hz), 2.31 (ddd, 1H,  $J = 14.7, 11.4, 6.0$  Hz);  $^1\text{H}$  NMR (400 MHz, DMSO- $d_6$ )  $\delta$  8.14 (d, 1H,  $J = 0.9$  Hz), 7.55 (brs, 1H), 7.23 (dd, 1H,  $J = 2.8, 1.8$  Hz), 6.93 (brs, 1H), 6.79 (dd, 1H,  $J = 3.6, 1.8$  Hz), 6.12 (dd, 1H,  $J = 3.6, 2.8$  Hz), 5.95 (ddd, 1H,  $J = 11.9, 11.4, 7.3$  Hz), 5.05 (dd, 1H,  $J = 6.9, 6.8$  Hz), 4.67 (dd, 1H,  $J = 11.4, 5.5$  Hz), 4.37 (m, 1H), 2.31 (dd, 1H,  $J = 13.7, 7.3$  Hz), 2.19 (ddd, 1H,  $J = 13.7, 11.9, 6.0$  Hz),  $^{13}\text{C}$  NMR (125 MHz, DMSO- $d_6$ )  $\delta$  163.1, 158.5, 126.3, 122.7, 113.6, 108.3, 75.9, 63.9, 58.5, 56.9, 37.7. **Carbamate 9**: IR (KBr)  $\nu$  3389, 2951, 1690, 1663  $\text{cm}^{-1}$ ;  $^1\text{H}$  NMR (400 MHz,  $\text{CD}_3\text{OD}$ )  $\delta$  6.86-6.77 (m, 2H), 6.49 (m, 1H), 6.21-6.13 (m, 2H), 6.08 (dd, 1H,  $J = 3.7, 2.7$  Hz), 5.69 (m, 1H), 2.49 (ddd, 1H,  $J = 15.1, 7.8, 2.7$  Hz), 2.06 (ddd, 1H,  $J = 15.1, 7.3, 4.6$  Hz);  $^{13}\text{C}$  NMR (100 MHz,  $\text{CD}_3\text{OD}$ )  $\delta$  166.6, 159.7, 137.9, 135.3, 125.9, 124.2, 115.6, 109.1, 80.1, 63.1, 41.5. **Enone 10**: IR (neat)  $\nu$  3349, 2926, 1715, 1645  $\text{cm}^{-1}$ ;  $^1\text{H}$  NMR (400 MHz,  $\text{CD}_3\text{OD}$ )  $\delta$  7.76 (dd, 1H,  $J = 5.5, 2.7$  Hz), 6.90-6.80 (m, 2H), 6.66 (m, 1H), 6.39 (dd, 1H,  $J = 5.5, 2.3$  Hz), 6.15 (dd, 1H,  $J = 4.1, 2.8$  Hz), 3.02 (dd, 1H,  $J = 18.8, 6.4$  Hz), 2.27 (dd, 1H,  $J = 18.8, 2.3$  Hz);  $^1\text{H}$  NMR (300 MHz,  $\text{CDCl}_3$ )  $\delta$  7.65 (dd, 1H,  $J = 5.9, 2.4$  Hz), 6.86-6.72 (m, 3H), 6.42 (dd, 1H,  $J = 5.9, 1.7$  Hz), 6.19 (dd, 1H,  $J = 3.7, 2.8$  Hz), 5.60 (brs, 2H), 3.12 (dd, 1H,  $J = 19.3, 6.5$  Hz), 2.31 (dd, 1H,  $J = 19.3, 2.4$  Hz);  $^{13}\text{C}$  NMR (100 MHz,  $\text{CD}_3\text{OD}$ )  $\delta$  208.9, 166.3, 163.1, 136.7, 126.0, 124.7, 115.7, 109.9, 58.1, 45.0. All the spectroscopic and analytical data of chloride **5b**, carbamate **9**, and enone **10** were identical with those reported in the previous study [2]. The chemical shifts in the  $^{13}\text{C}$  NMR spectrum of carbamate **9** in the literature [2] were erroneous due to the incorrect assignment of reference solvent signal ( $\text{CD}_3\text{OD}$  for 49.0 ppm). The corrected data are given above.

### Table 1, entry 1

To a solution of *N*-tosyloxycarbamate **8** (20 mg, 0.049 mmol) in EtOH (1 mL) were added  $\text{Bu}_4\text{NBr}$  (23.8 mg, 0.074 mmol) and  $\text{FeBr}_2$  (5.4 mg, 0.025 mmol). The mixture was warmed to 28 °C in a water bath and sonicated for ca. 1 min to dissolve all the reagents. After being stirred for 1.75 h at the same temperature, the mixture was poured into a separatory funnel where it was partitioned between EtOAc and  $\text{H}_2\text{O}$ . The phases were separated, and the aqueous phase was extracted with EtOAc. The combined organic

extracts were dried over MgSO<sub>4</sub>, filtered, and concentrated under reduced pressure. The residue was purified by flash silica gel column chromatography (EtOAc/*n*-hexane 2:1→EtOAc v/v) to afford bromide **5a** (2.0 mg, 13%), enone **10** (2.8 mg, 30%), and carbamate **9** (4.5 mg, 39%). **Bromide 5b**: IR (KBr)  $\nu$  3376, 2955, 1751, 1647 cm<sup>-1</sup>; <sup>1</sup>H NMR (400 MHz, CD<sub>3</sub>OD)  $\delta$  7.13 (dd, 1H, *J* = 2.8, 1.4 Hz), 6.81 (dd, 1H, *J* = 3.7, 1.4 Hz), 6.19 (dd, 1H, *J* = 3.7, 2.8 Hz), 5.97 (ddd, 1H, *J* = 11.5, 11.0, 7.3 Hz), 5.17 (t, 1H, *J* = 6.9 Hz), 4.57 (dd, 1H, *J* = 11.0, 6.0 Hz), 4.47 (m, 1H), 2.55 (dd, 1H, *J* = 14.2, 7.3 Hz), 2.29 (ddd, 1H, *J* = 14.2, 11.5, 6.0 Hz); <sup>1</sup>H NMR (400 MHz, DMSO-*d*<sub>6</sub>)  $\delta$  8.11 (d, 1H, *J* = 0.9 Hz), 7.55 (brs, 1H), 7.21 (dd, 1H, *J* = 2.7, 1.4 Hz), 6.92 (brs, 1H), 6.78 (dd, 1H, *J* = 3.7, 1.4 Hz), 6.11 (dd, 1H, *J* = 3.7, 2.7 Hz), 6.00 (ddd, 1H, *J* = 12.4, 11.4, 7.3 Hz), 5.06 (dd, 1H, *J* = 6.9, 6.4 Hz), 4.69 (dd, 1H, *J* = 11.4, 5.5 Hz), 4.37 (m, 1H), 2.31 (dd, 1H, *J* = 13.7, 7.3 Hz), 2.15 (ddd, 1H, *J* = 13.7, 12.4, 6.4 Hz), <sup>13</sup>C NMR (125 MHz, DMSO-*d*<sub>6</sub>)  $\delta$  163.1, 158.4, 126.3, 122.6, 113.5, 108.3, 76.3, 58.8, 57.1, 56.0, 38.0. The spectroscopic and analytical data of bromide **5a** were exactly matched with those reported in the previous study [2].

#### Table 1, entry 2

To a solution of *N*-tosyloxycarbamate **8** (20 mg, 0.0493 mmol in EtOH (1 mL) were added Bu<sub>4</sub>NCl (16.4 mg, 0.0592 mmol) and FeCl<sub>2</sub> (3.2 mg, 0.0247 mmol). The mixture was warmed to 28 °C in a water bath and sonicated for ca. 1 min to dissolve all the reagents. After being stirred for 0.75 h at the same temperature, the mixture was poured into a separatory funnel where it was partitioned between EtOAc and H<sub>2</sub>O. The phases were separated, and the aqueous phase was extracted with EtOAc. The combined organic extracts were dried over MgSO<sub>4</sub>, filtered, and concentrated under reduced pressure. The residue was purified by flash silica gel column chromatography (EtOAc/*n*-hexane 2:1→EtOAc v/v) to afford chloride **5b** (5.2 mg, 39%), enone **10** (1.8 mg, 19%), and carbamate **9** (2.4 mg, 20%). The yields of the materials were determined by <sup>1</sup>H NMR analysis.

**Table 1, entry 3**

To a solution of *N*-tosyloxycarbamate **8** (20 mg, 0.049 mmol) in *t*-BuOH (1 mL) were added Bu<sub>4</sub>NBr (19.1 mg, 0.059 mmol) and FeBr<sub>2</sub> (5.4 mg, 0.025 mmol). The mixture was warmed to 28 °C in a water bath and sonicated for ca. 1 min to dissolve all the reagents. After being stirred for 0.5 h at the same temperature, the mixture was poured into a separatory funnel where it was partitioned between EtOAc and H<sub>2</sub>O. The phases were separated, and the aqueous phase was extracted with EtOAc. The combined organic extracts were dried over MgSO<sub>4</sub>, filtered, and concentrated under reduced pressure. The residue was purified by flash silica gel column chromatography (EtOAc/*n*-hexane 2:1→EtOAc v/v) to afford bromide **5a** (5.8 mg, 38%), carbamate **9** (2.5 mg, 22%), and enone **10** (1.8 mg, 19%). The yields of the materials were determined by <sup>1</sup>H NMR analysis.

**Table 1, entry 5**

To a solution of *N*-tosyloxycarbamate **8** (20 mg, 0.049 mmol) in *t*-BuOH (1 mL) were added Bu<sub>4</sub>NBr (19.1 mg, 0.059 mmol) and FeBr<sub>2</sub> (2.2 mg, 0.01 mmol). The mixture was warmed to 28 °C in a water bath and sonicated for ca. 1 min to dissolve all the reagents. After being stirred for 3.3 h at the same temperature, the mixture was poured into a separatory funnel where it was partitioned between EtOAc and H<sub>2</sub>O. The phases were separated, and the aqueous phase was extracted with EtOAc. The combined organic extracts were dried over MgSO<sub>4</sub>, filtered, and concentrated under reduced pressure. The residue was purified by flash silica gel column chromatography (EtOAc/*n*-hexane 2:1 v/v → EtOAc) to afford bromide **5a** (3.8 mg, 25%), carbamate **9** (1.9 mg, 16%), and enone **10** (0.5 mg, 5%), and unreacted *N*-tosyloxycarbamate **8** (4.4 mg, 22%). The yields of the materials were determined by <sup>1</sup>H NMR analysis.

**Table 1, entry 6**

To a solution of *N*-tosyloxycarbamate **8** (20 mg, 0.049 mmol) in *t*-BuOH (1 mL) were added Bu<sub>4</sub>NCl (16.4 mg, 0.059 mmol) and FeCl<sub>2</sub> (1.3 mg, 0.01 mmol). The mixture was warmed to 28 °C in a water bath and sonicated for ca. 1 min to dissolve all the reagents. After being stirred for 3.3 h at the same temperature, the mixture was poured into a

separatory funnel where it was partitioned between EtOAc and H<sub>2</sub>O. The phases were separated, and the aqueous phase was extracted with EtOAc. The combined organic extracts were dried over MgSO<sub>4</sub>, filtered, and concentrated under reduced pressure. The residue was purified by flash silica gel column chromatography (EtOAc/*n*-hexane 2:1 v/v → EtOAc) to afford chloride **5b** (4.1 mg, 31%), carbamate **9** (1.1 mg, 9%), and enone **10** (1.3 mg, 14%), and unreacted *N*-tosyloxycarbamate **8** (6.0 mg, 30%). The yields of the materials were determined by <sup>1</sup>H NMR analysis.

#### Table 1, entry 7

To a solution of *N*-tosyloxycarbamate **8** (20 mg, 0.049 mmol) in EtOH (1 mL) were added TMSCl (9.4 μL, 0.073 mmol) and FeCl<sub>2</sub> (3.2 mg, 0.025 mmol). The mixture was warmed to 28 °C in a water bath and sonicated for ca. 1 min to dissolve all the reagents. After being stirred for 16 h at the same temperature, the mixture was poured into a separatory funnel where it was partitioned between EtOAc and H<sub>2</sub>O. The phases were separated, and the aqueous phase was extracted with EtOAc. The combined organic extracts were dried over MgSO<sub>4</sub>, filtered, and concentrated under reduced pressure. The residue was purified by flash silica gel column chromatography (EtOAc/*n*-hexane 4:1 → EtOAc) to afford chloride **5b** (3.9 mg, 29%), carbamate **9** (1.4 mg, 12%), diethyl ketal **12** (1.8 mg, 14%), and ketone **11** (1.5 mg, 16%). The yields of the materials were determined by <sup>1</sup>H NMR analysis. **Ketone 11**: colorless solid;  $[\alpha]_D^{21} -10.1$  (*c* 0.14, MeOH); IR (neat)  $\nu$  3223, 2926, 1748, 1645 cm<sup>-1</sup>; <sup>1</sup>H NMR (400 MHz, CD<sub>3</sub>OD)  $\delta$  7.05 (dd, 1H, *J* = 2.7, 1.4 Hz), 6.91 (dd, 1H, *J* = 3.7, 1.4 Hz), 6.27 (dd, 1H, *J* = 3.7, 2.7 Hz), 4.95 (ddd, 1H, *J* = 12.4, 7.3, 5.0 Hz), 4.53 (m, 1H), 2.84 (dd, 1H, *J* = 18.3, 7.3 Hz), 2.71 (dd, 1H, *J* = 18.3, 6.0 Hz), 2.57 (ddd, 1H, *J* = 18.7, 7.3, 1.8 Hz), 2.44 (ddd, 1H, *J* = 18.7, 3.7, 1.4 Hz); <sup>13</sup>C NMR (100 MHz, CD<sub>3</sub>OD)  $\delta$  213.0, 162.4, 125.4, 122.9, 115.6, 111.4, 54.9, 53.4, 45.4, 43.7; MS *m/z*: 190 (*M*<sup>+</sup>), 190 (100%); HRMS–EI (*m/z*): [*M*]<sup>+</sup> calcd for C<sub>10</sub>H<sub>10</sub>N<sub>2</sub>O<sub>2</sub>, 190.0742; found, 190.0741. **Diethyl ketal 12**: colorless solid;  $[\alpha]_D^{22} +1.8$  (*c* 0.18, CHCl<sub>3</sub>); IR (neat)  $\nu$  3206, 2974, 1651 cm<sup>-1</sup>; <sup>1</sup>H NMR (400 MHz, CDCl<sub>3</sub>)  $\delta$  6.97 (dd, 1H, *J* = 3.7, 1.4 Hz), 6.44 (dd, 1H, *J* = 2.9, 1.4 Hz), 6.27 (dd, 1H, *J* = 3.7, 1.4 Hz), 5.92 (brs, 1H), 4.56 (m, 1H), 4.26 (m, 1H), 3.55-3.33 (m, 4H), 2.47 (dd, 1H, *J* = 13.3, 6.9 Hz), 2.42-2.29 (m, 2H), 2.02 (dd, 1H, *J* = 13.7, 5.0 Hz), 1.20 (t, 3H, *J* = 6.9 Hz), 1.12



(t, 3H,  $J = 6.9$  Hz);  $^{13}\text{C}$  NMR (100 MHz,  $\text{CDCl}_3$ )  $\delta$  159.5, 122.8, 122.3, 114.0, 110.2, 107.5, 57.8, 56.4, 55.0, 53.4, 42.3, 41.6, 15.3, 15.1; MS  $m/z$ : 264 ( $\text{M}^+$ ), 135 (100%); HRMS–EI ( $m/z$ ):  $[\text{M}]^+$  calcd for  $\text{C}_{14}\text{H}_{20}\text{N}_2\text{O}_3$ , 264.1474; found, 264.1475.

**Aminobromination of azidoformate 3 with  $\text{FeBr}_2/\text{Bu}_4\text{NBr}$ :** To a stirred solution of azidoformate **3** (2.0 g, 7.66 mmol) in EtOH (100 mL) were added  $\text{Bu}_4\text{NBr}$  (3.7 g, 11.4 mmol) and  $\text{FeBr}_2$  (843 mg, 3.81 mmol). The mixture was warmed to 28 °C in a water bath and sonicated for ca. 1 min to dissolve all the reagents. After being stirred for 10 h at the same temperature, the mixture was filtered through a pad of celite/florisil, and the filtrate was concentrated under reduced pressure. The residue was diluted with EtOAc and poured into a separatory funnel where it was partitioned between EtOAc and  $\text{H}_2\text{O}$ . The organic extracts were combined, dried over  $\text{MgSO}_4$ , filtered, and concentrated. The residue was rinsed with MeOH and filtered to give bromide **5a** (1.61 g, 67%) as a colorless solid. The filtrate was concentrated under reduced pressure to provide a residue, which was further purified by flash silica gel column chromatography (EtOAc/*n*-hexane 4:1 v/v  $\rightarrow$  EtOAc) to afford carbamate **9** (281 mg, 16%), enone **10** (51 mg, 3%), and additional bromide **5a** (67 mg, 3%), all as colorless solids.

**Reaction of enone 10 with TMSCl in EtOH:** To a solution of enone **10** (15 mg, 0.08 mmol) in EtOH (1 mL) was added TMSCl (12  $\mu\text{L}$ , 0.09 mmol). After being stirred for 3 h at room temperature, the mixture was poured into a separatory funnel where it was partitioned between EtOAc and  $\text{H}_2\text{O}$ . The phases were separated and the aqueous phase was extracted with EtOAc. The combined organic extracts were dried over  $\text{MgSO}_4$ , filtered, and concentrated under reduced pressure. The residue was purified by flash silica gel column chromatography (EtOAc/*n*-hexane 4:1  $\rightarrow$  6:1  $\rightarrow$  EtOAc v/v) to give ketone **11** (1.5 mg, 10%) and diethyl ketal **12** (4.0 mg, 19%), both as colorless solids.

## References

- 1) Yoshimitsu, T.; Ino, T.; Tanaka, T. *Org. Lett.* **2008**, *10*, 5457.
- 2) Yoshimitsu, T.; Ino, T.; Futamura, N.; Kamon, T.; Tanaka, T. *Org. Lett.* **2009**, *11*, 3402.

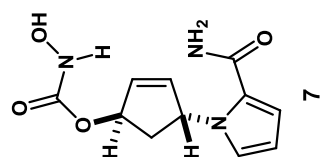

2.01

1.00

2.00

1.00

1.00

1.00

1.00

1.00

1.00

PPM

0

1

2

3

4

5

6

7

8

41.515  
48.361  
48.571  
48.790  
49.000  
49.210  
49.429  
49.639  
49.849  
63.121

80.903

109.182

115.599

124.180

125.935

134.869

138.444

160.517

166.552

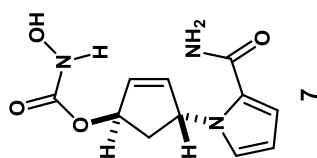

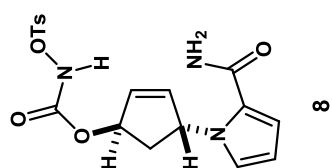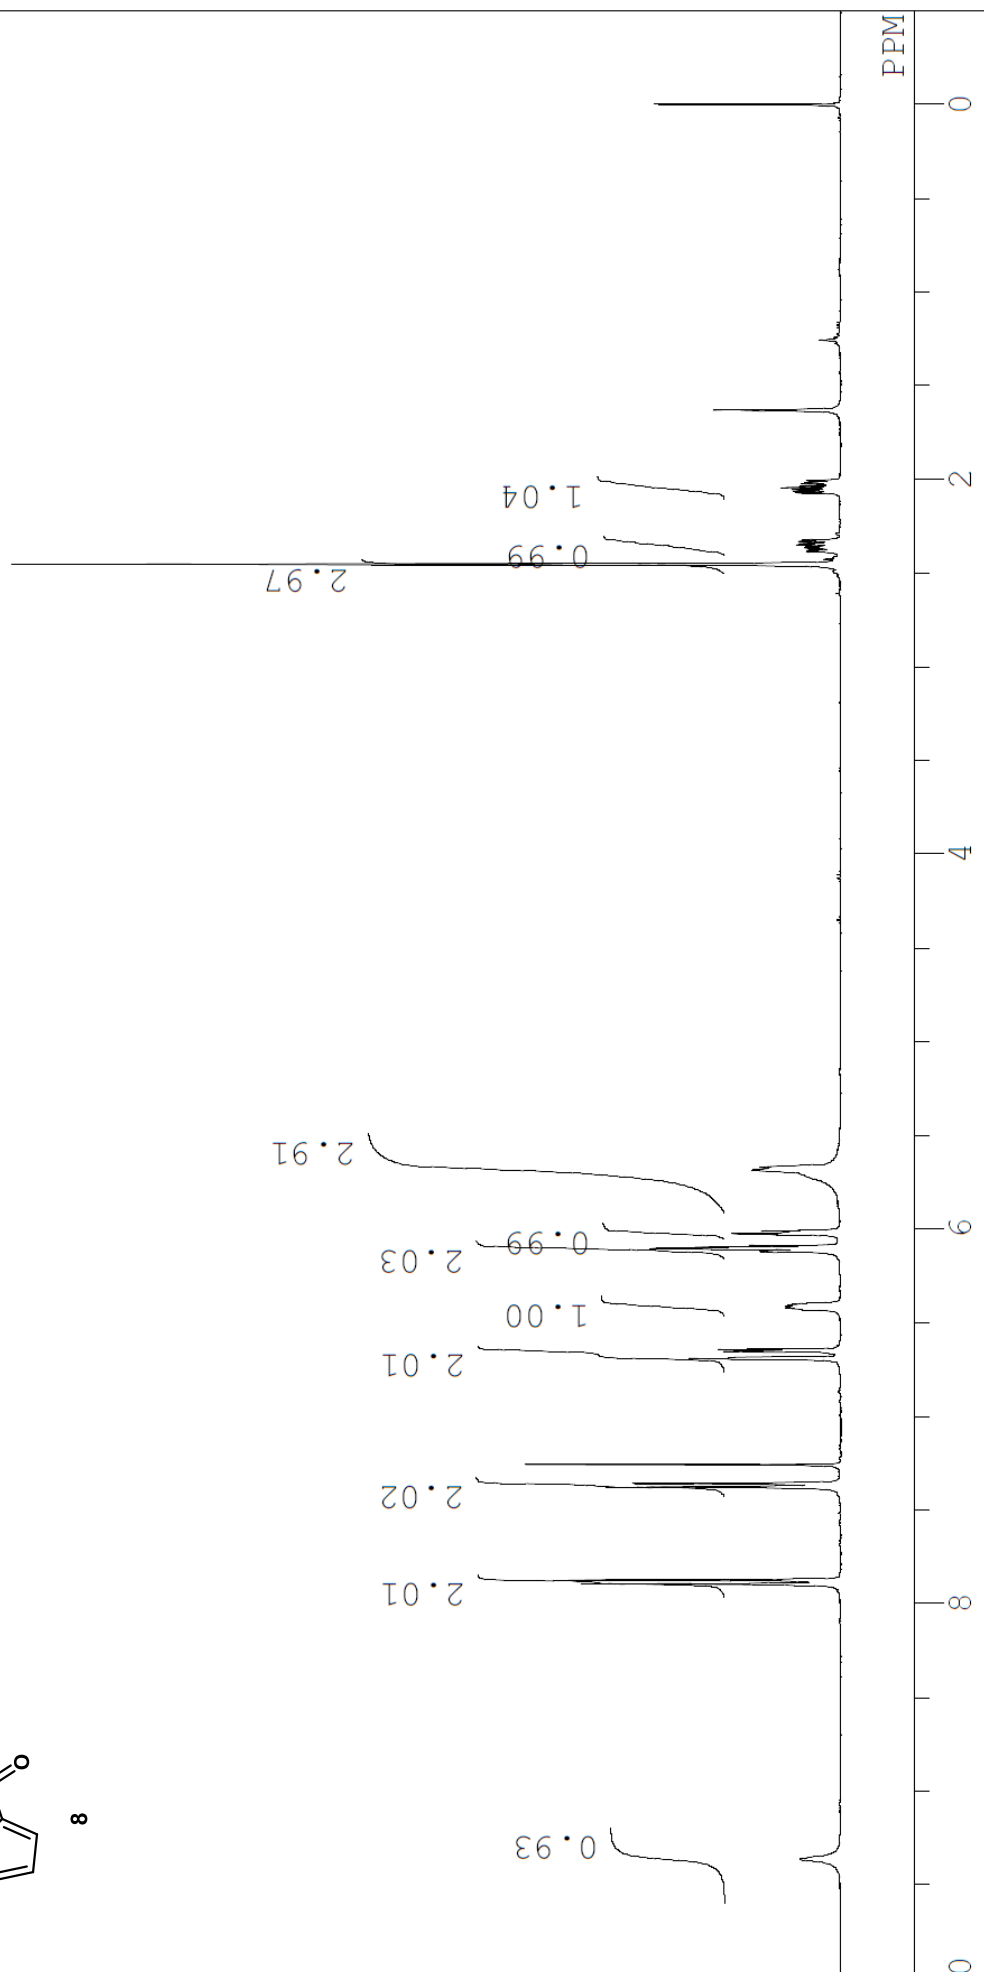

100MHz, CDCl<sub>3</sub>

21.776

39.834

61.840

76.685

77.000

77.315

81.176

108.283

114.023

123.348

123.958

129.621

129.726

130.251

133.416

137.354

146.097

155.441

163.641

PPM

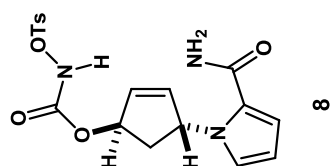

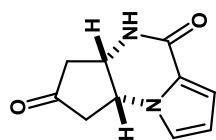

11

1.07  
1.08  
1.07  
1.05

1.01

0.99

0.96

1.00  
0.93

PPM

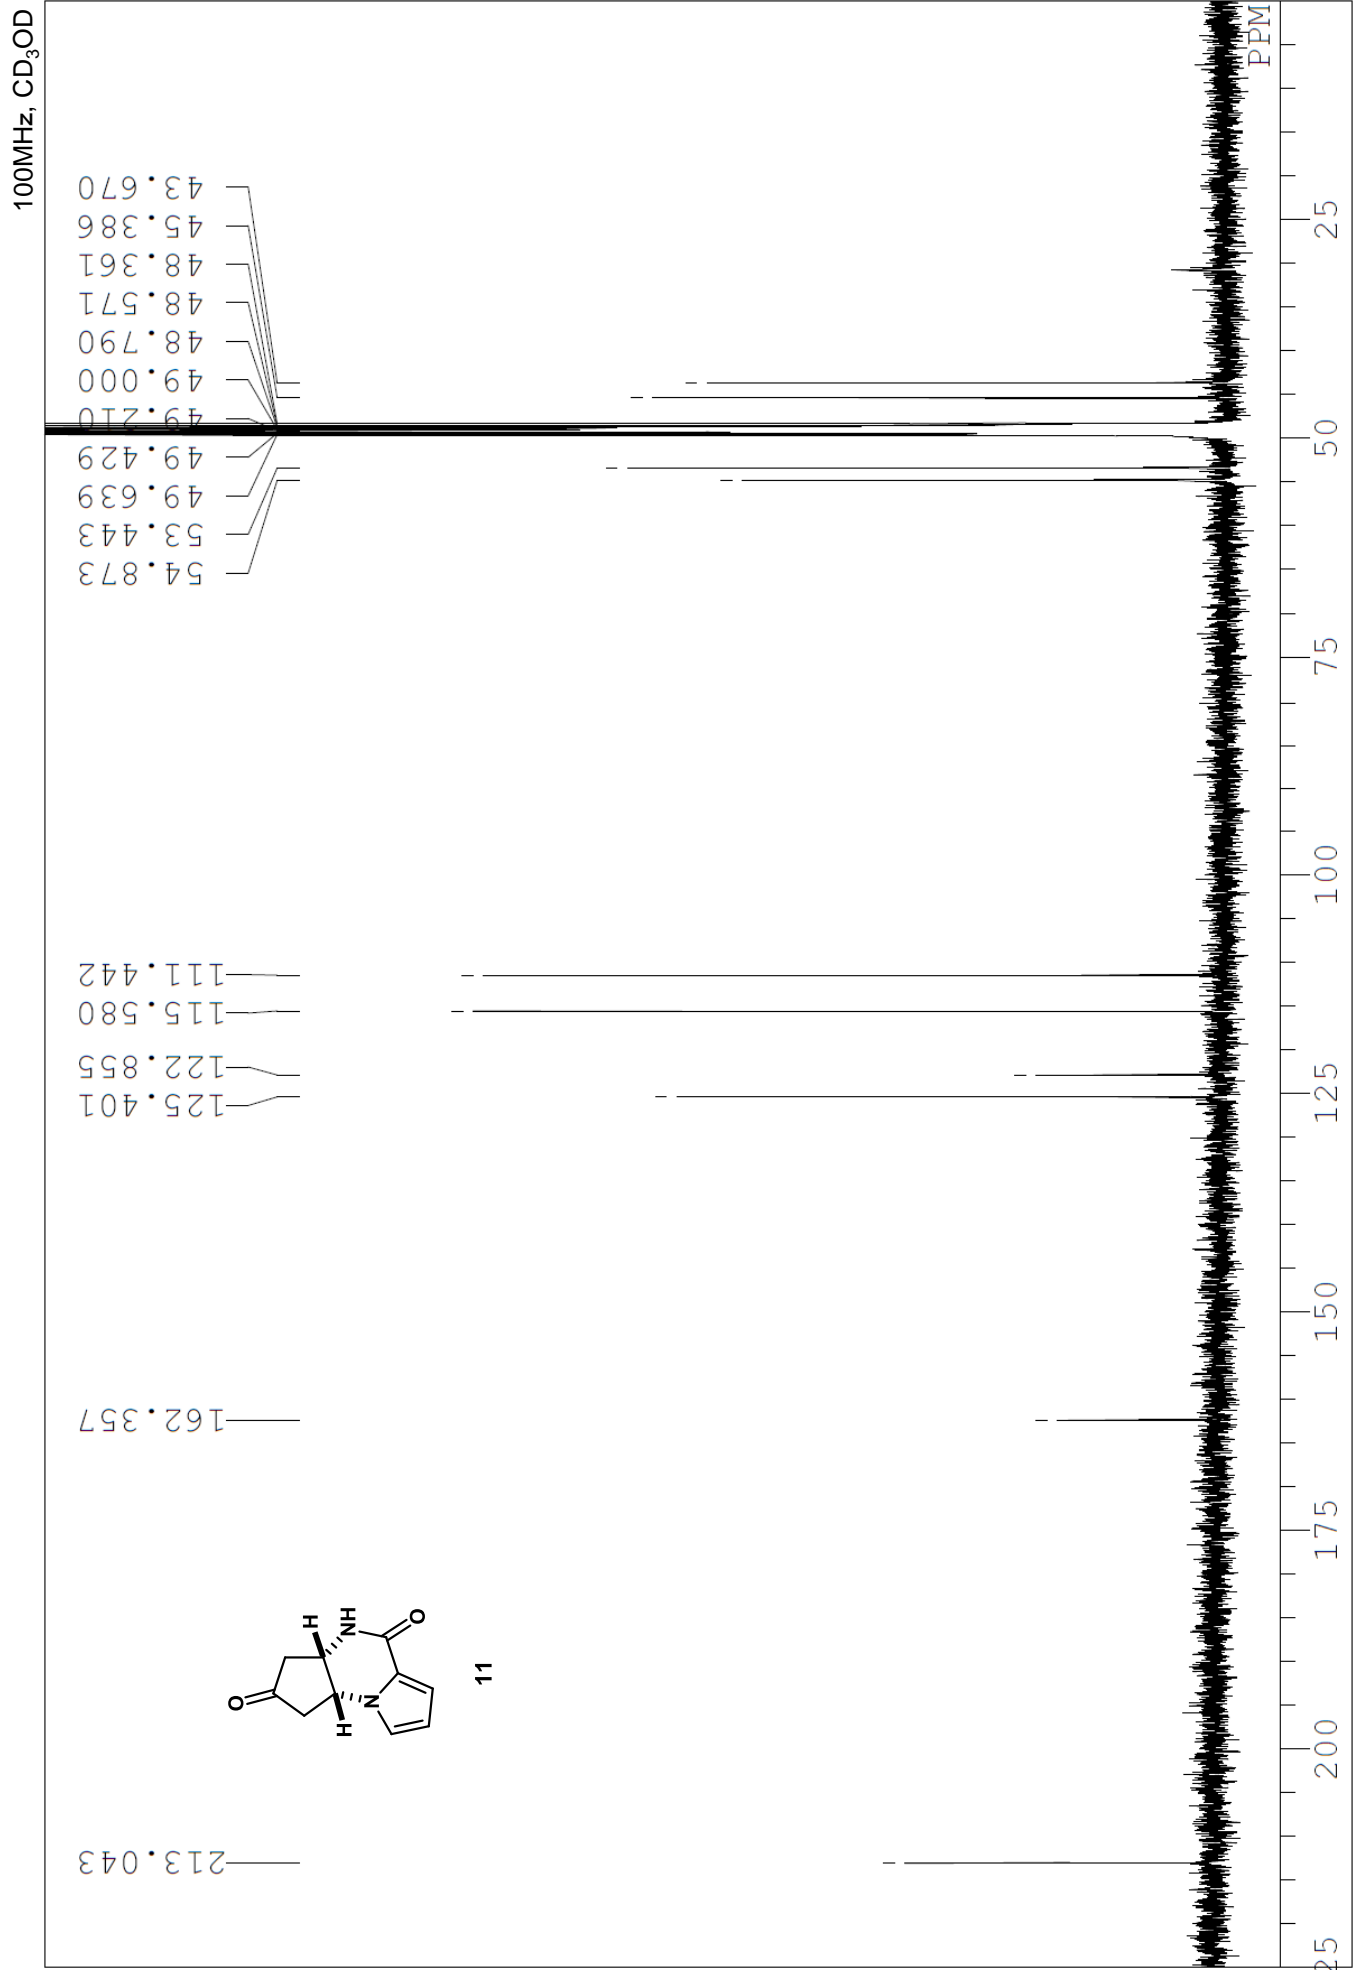



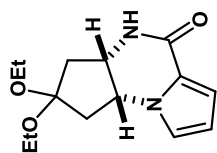

12

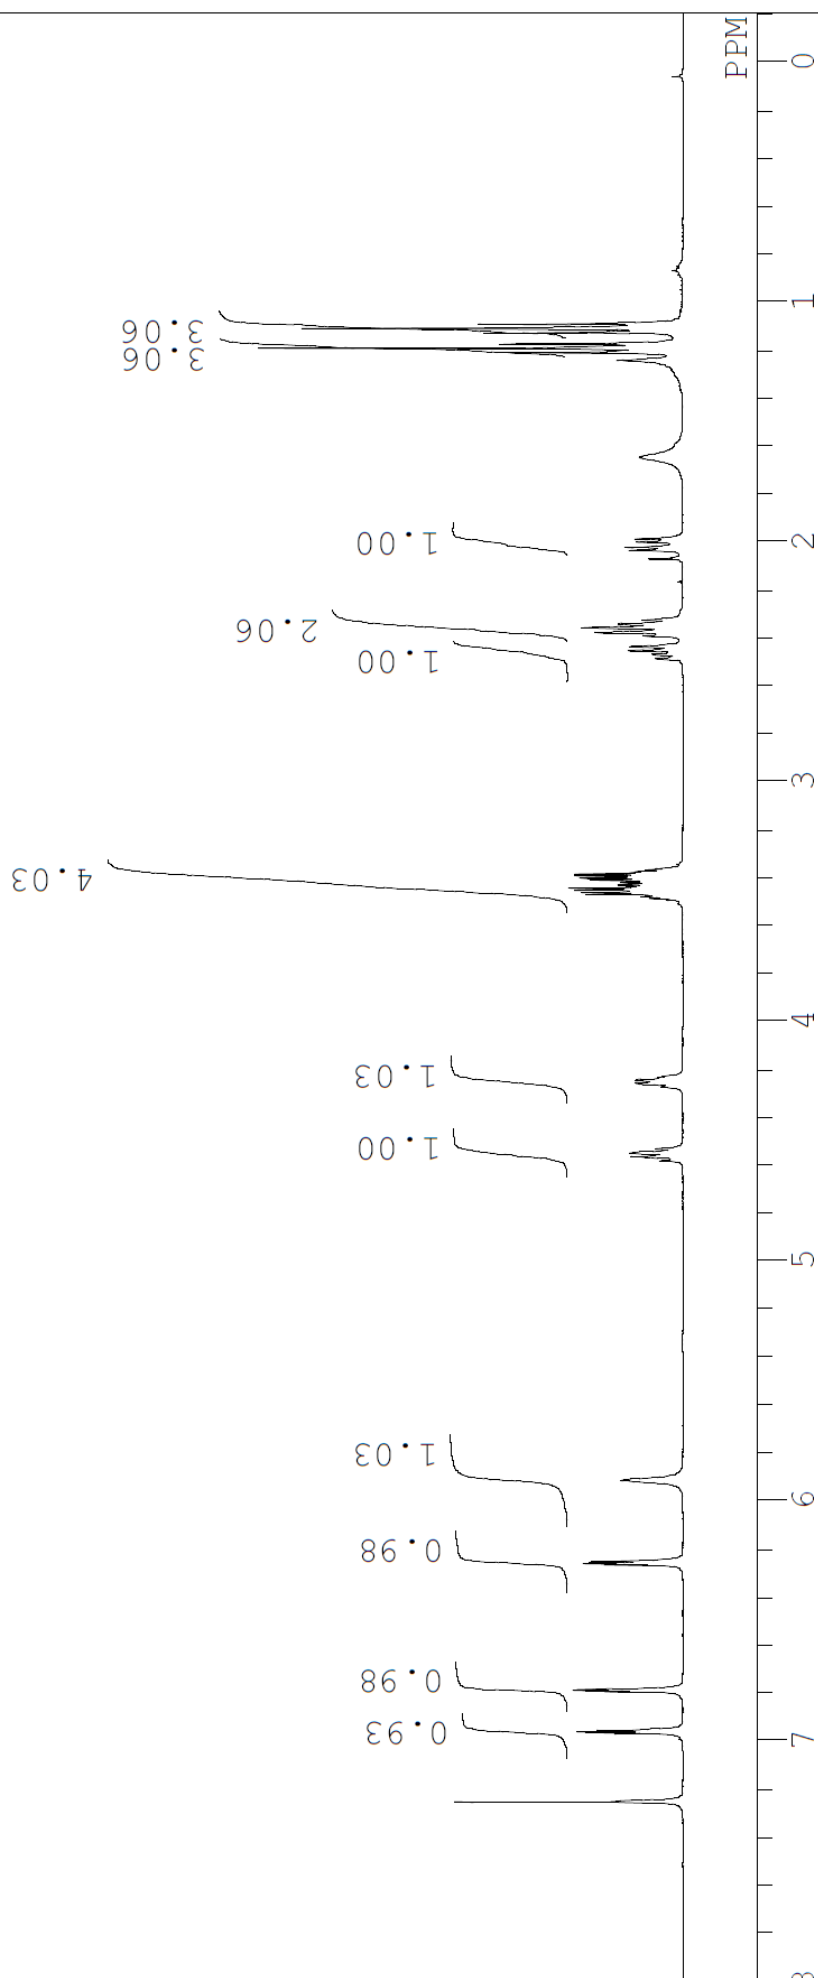

15.311  
15.12141.636  
42.33253.373  
55.013  
56.434  
57.80776.676  
77.000  
77.315107.482  
110.238  
114.042122.261  
122.814

159.531

PPM



12

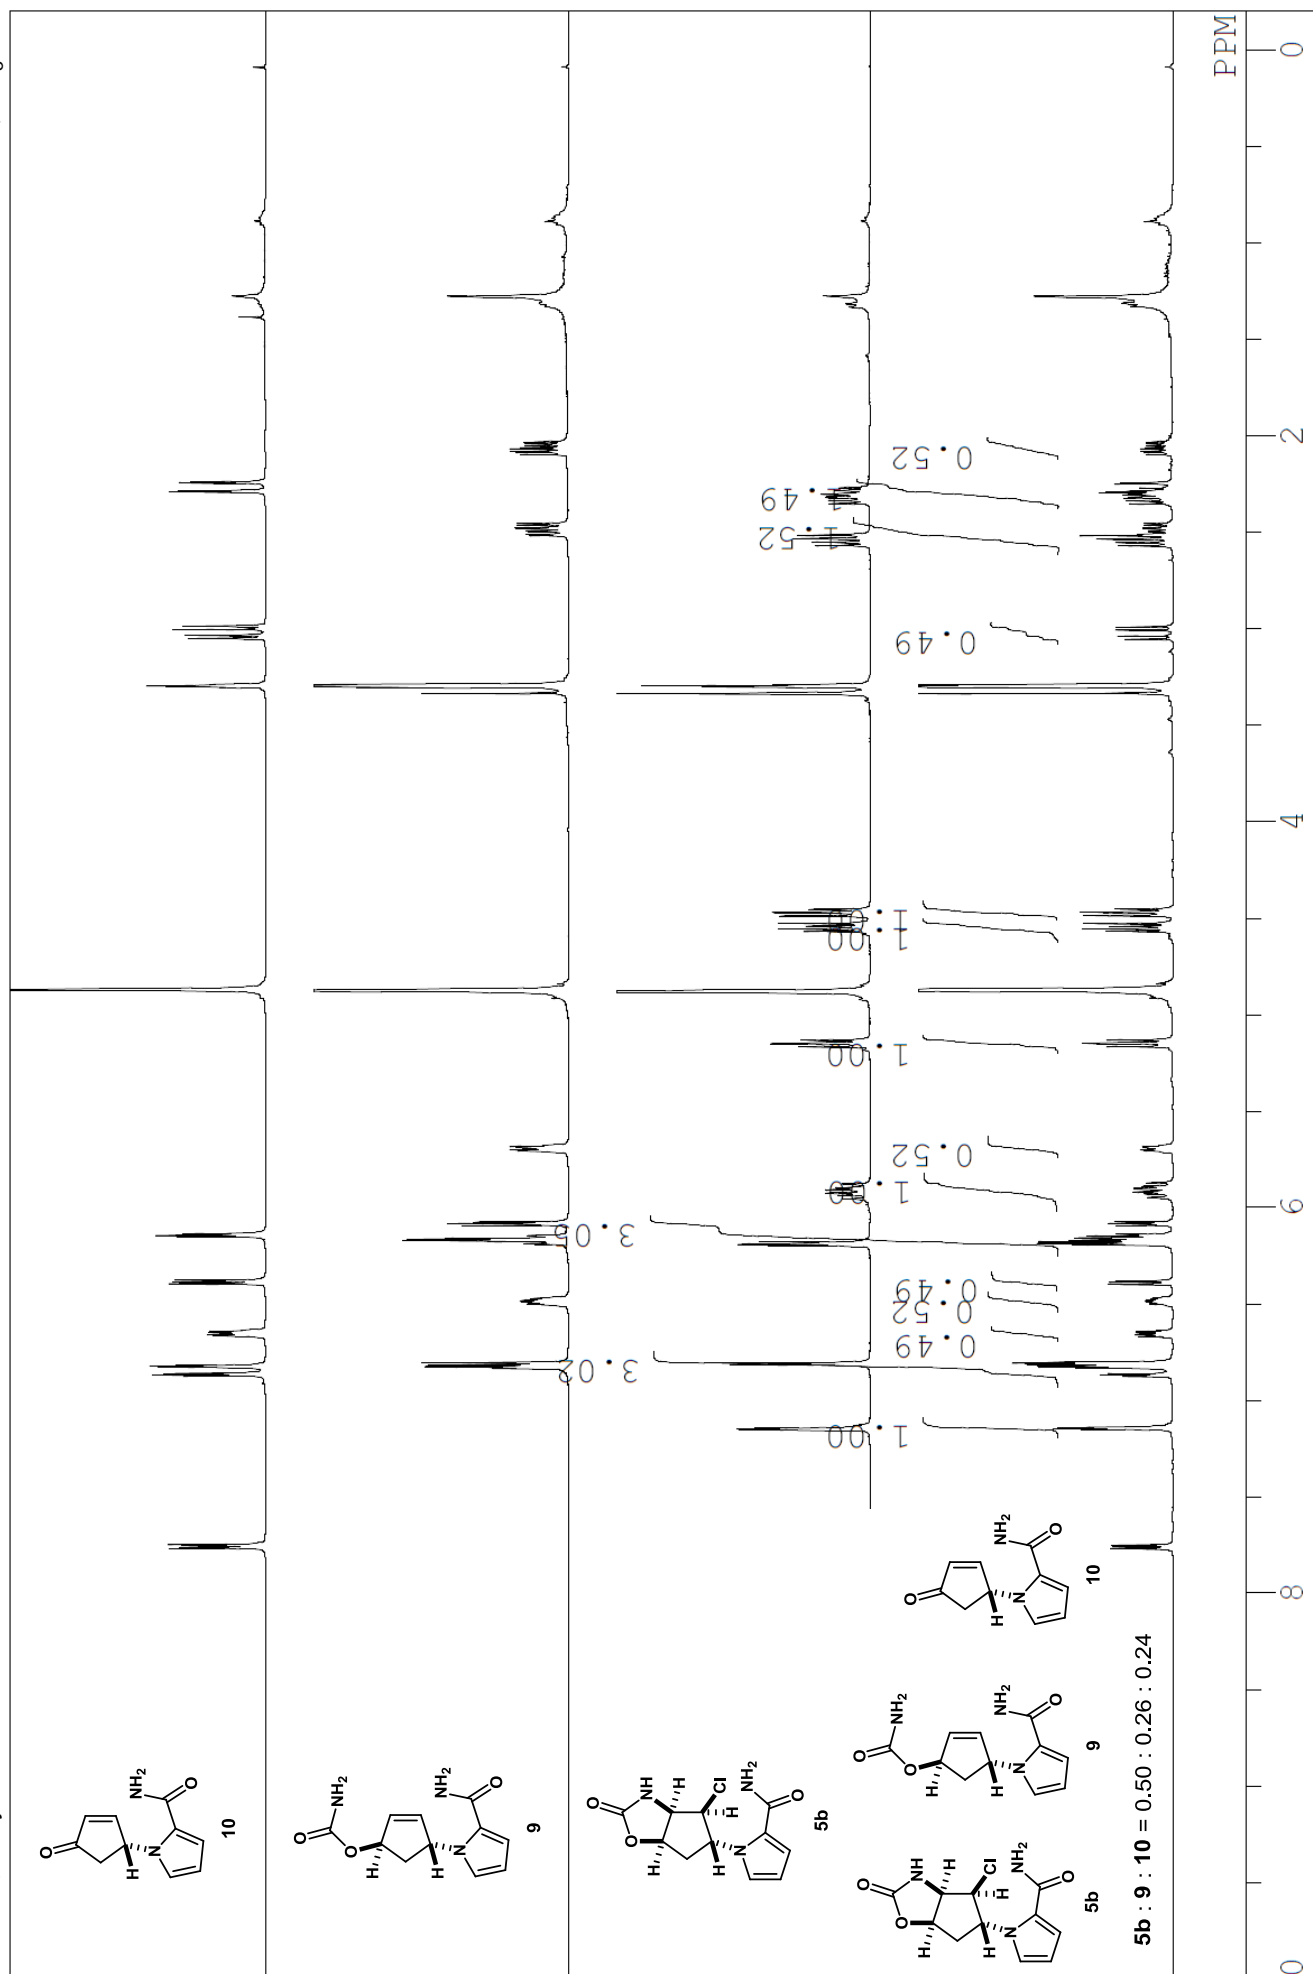

Table 1, entry 2

400MHz, CD<sub>3</sub>OD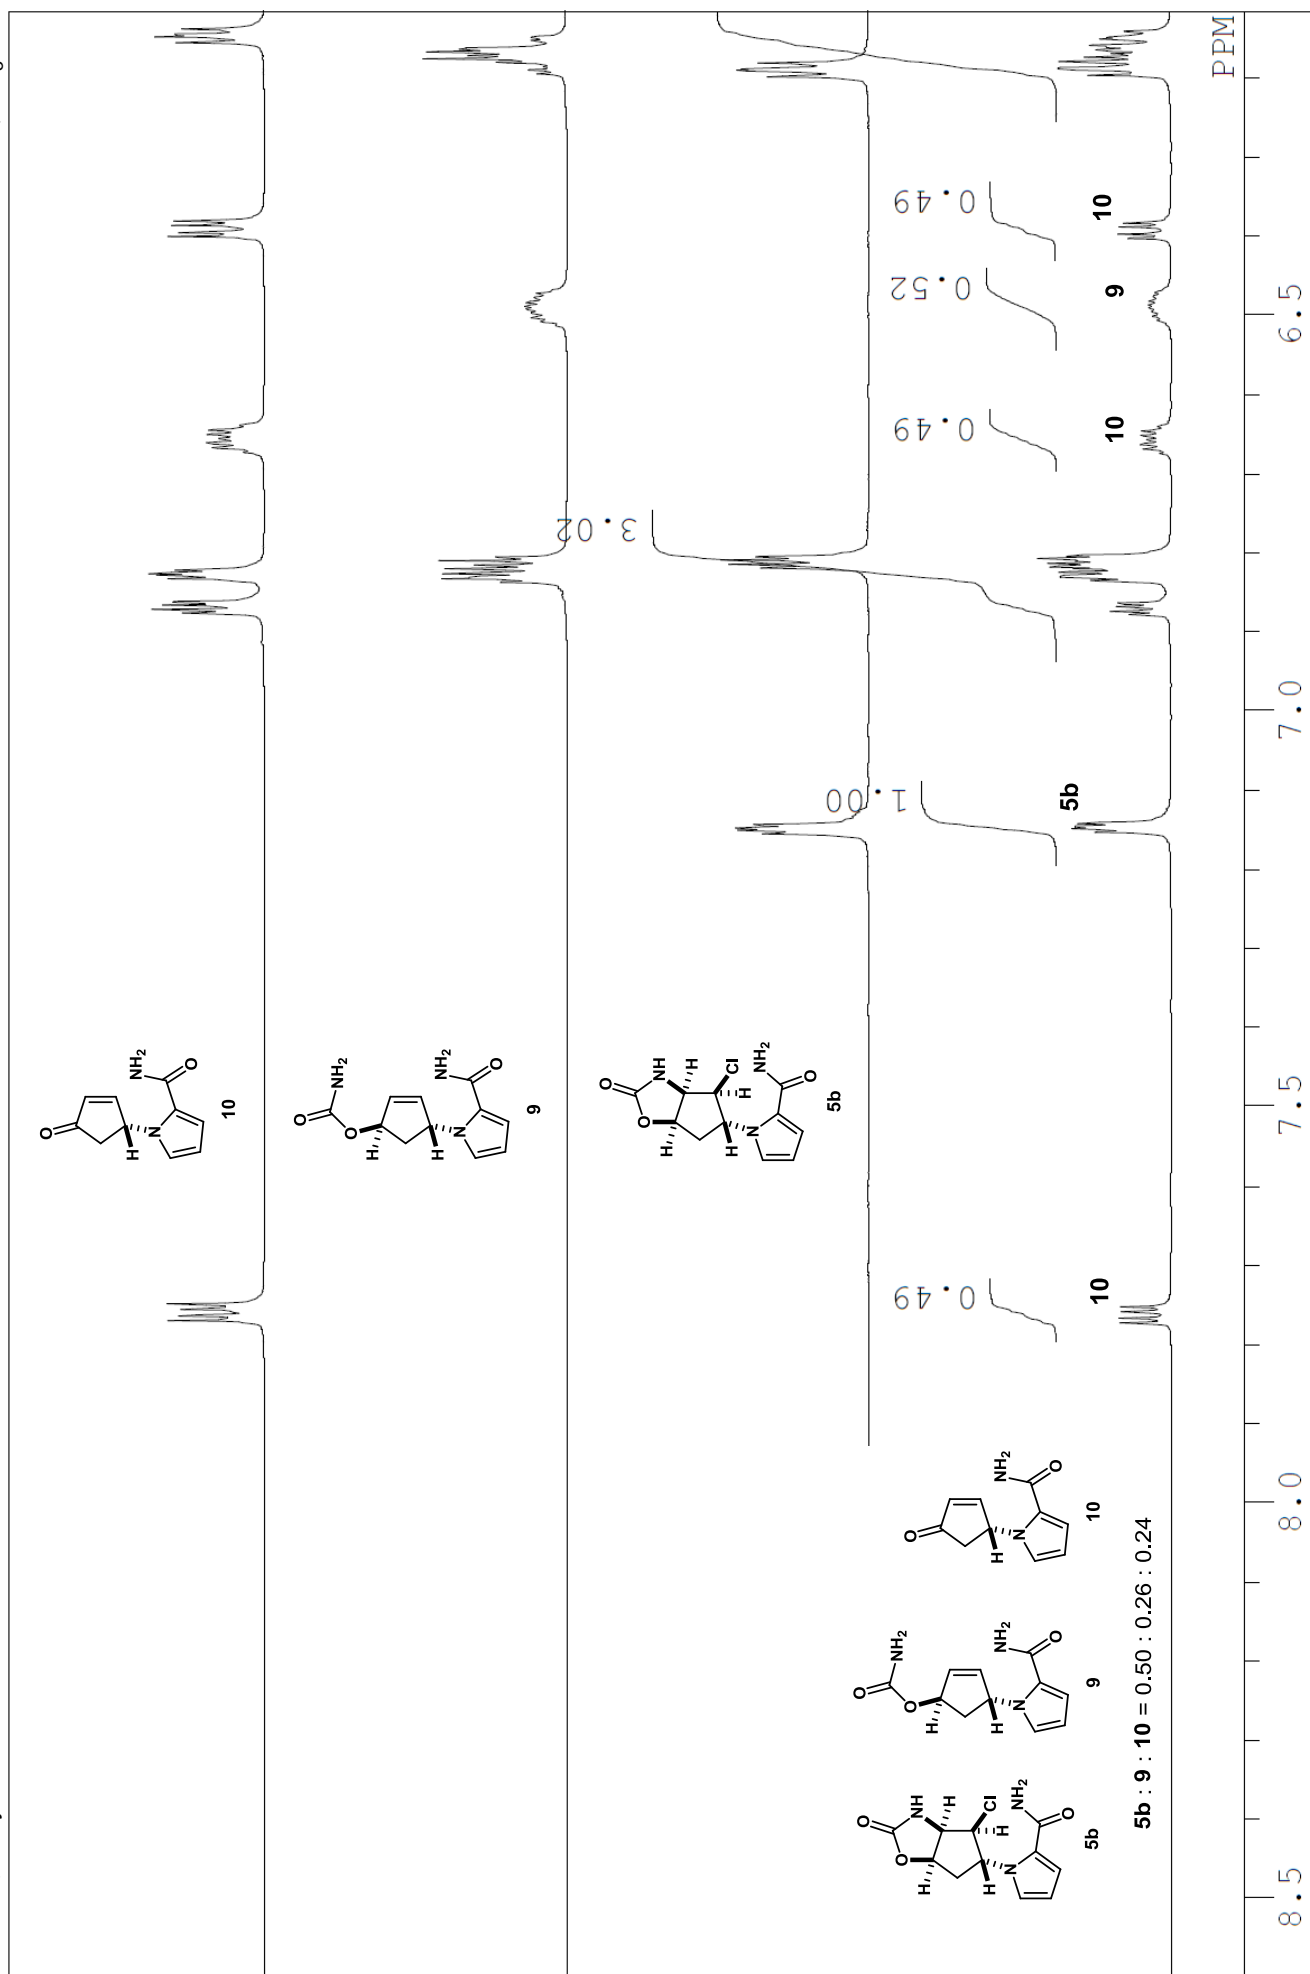

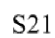

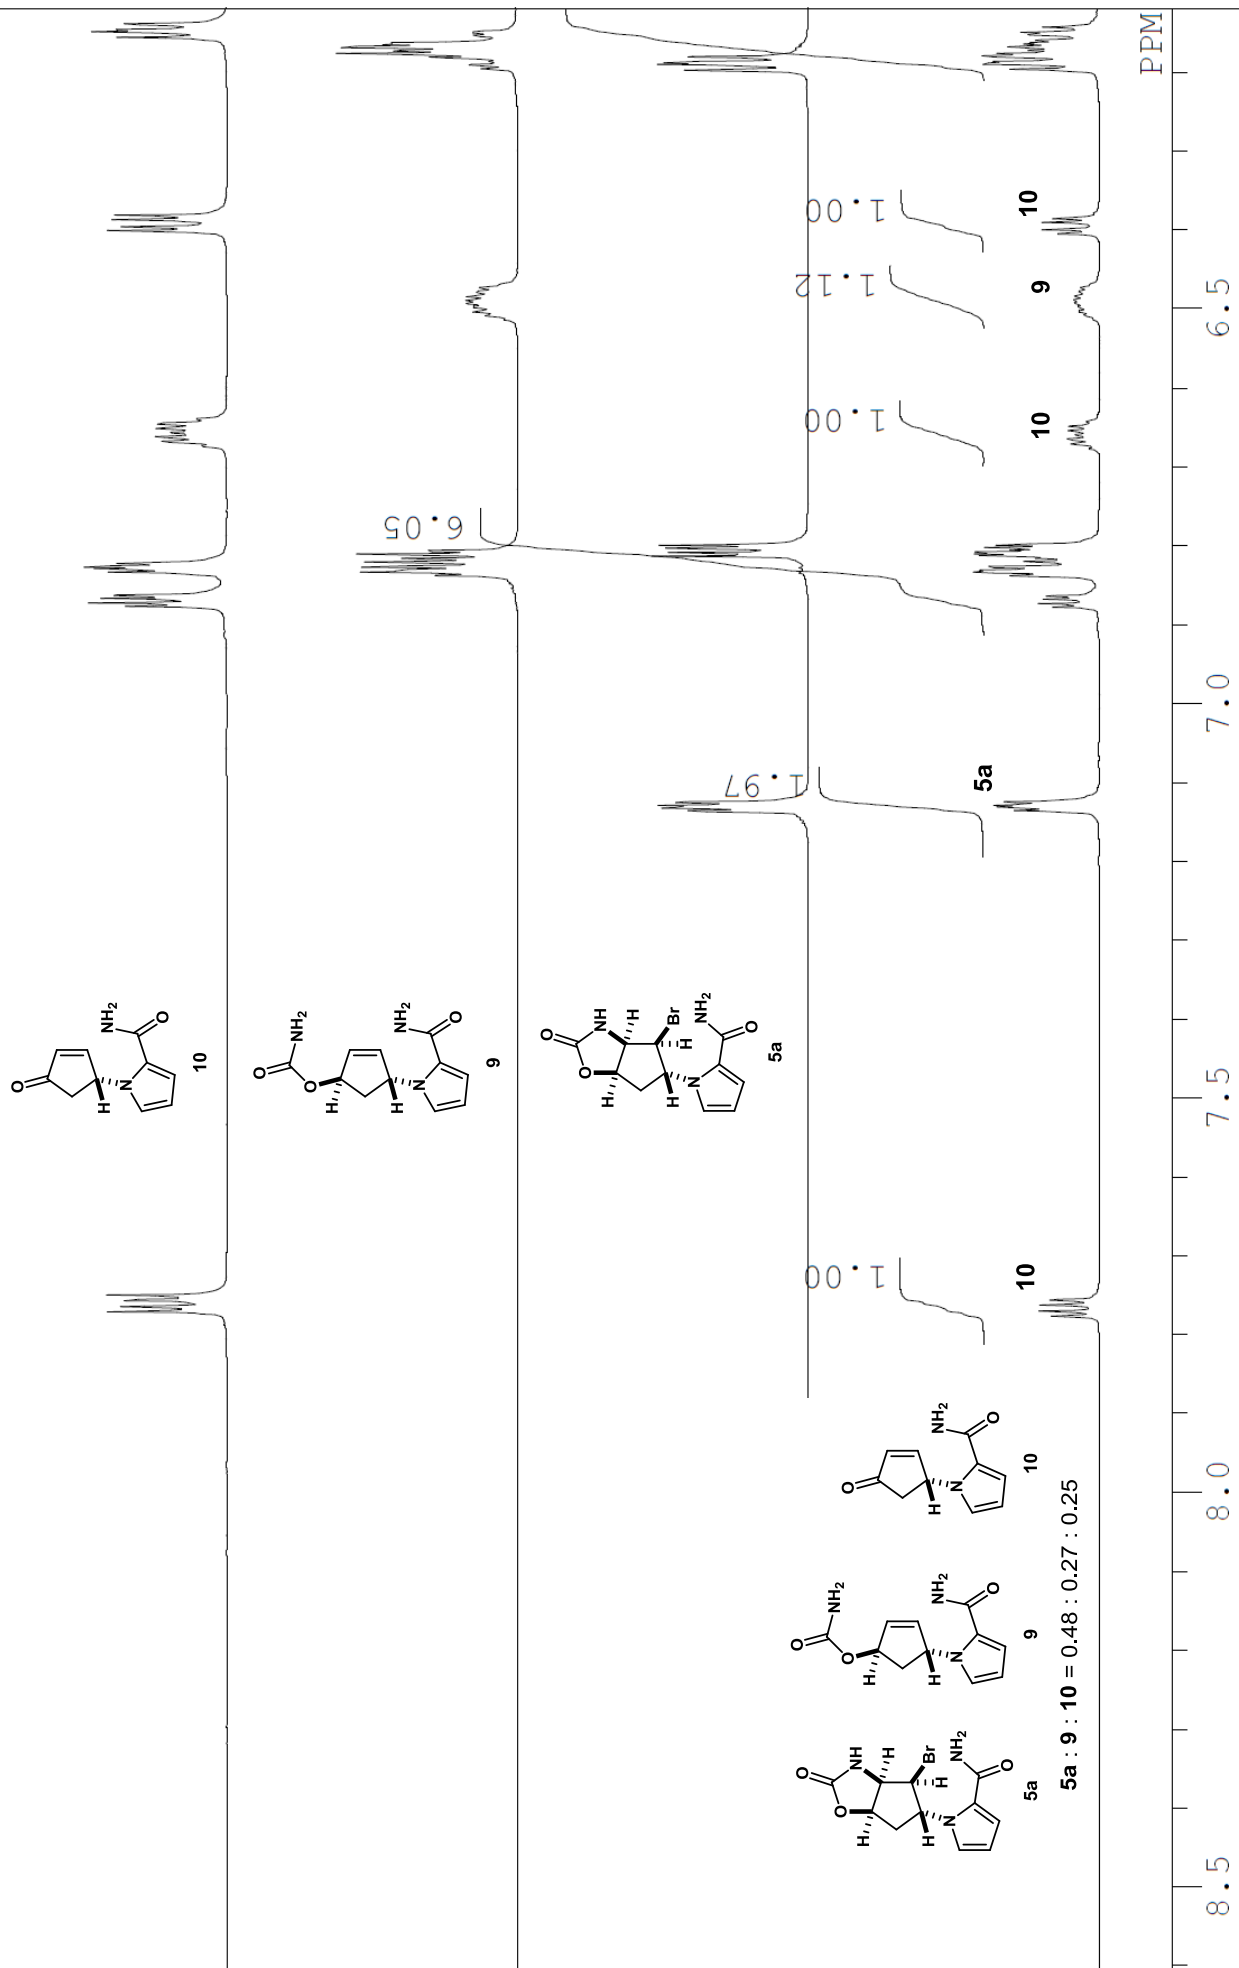

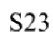

Table 1, entry 5

400MHz, CD<sub>3</sub>OD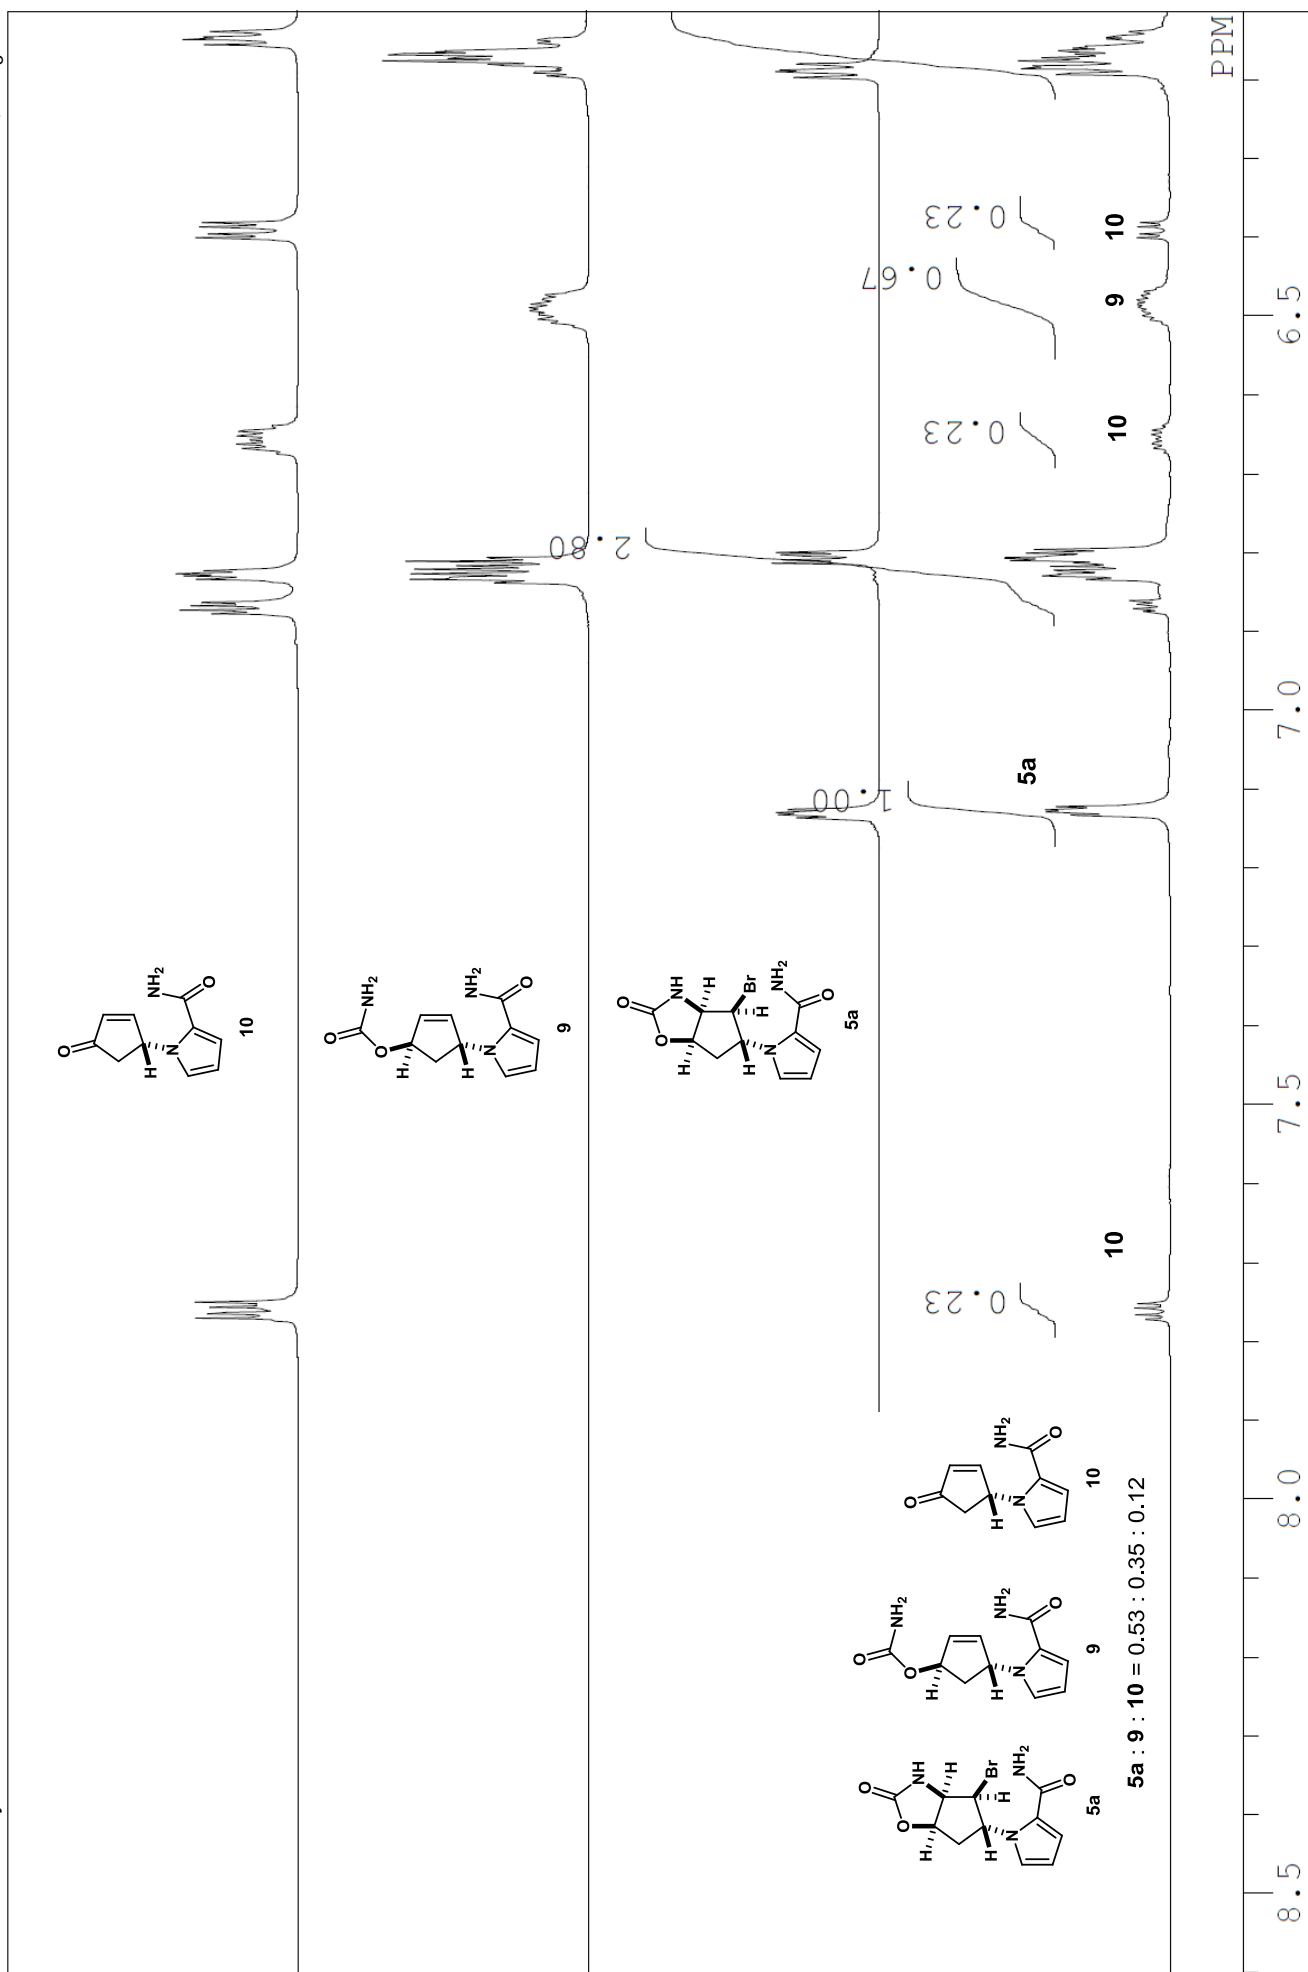



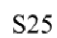

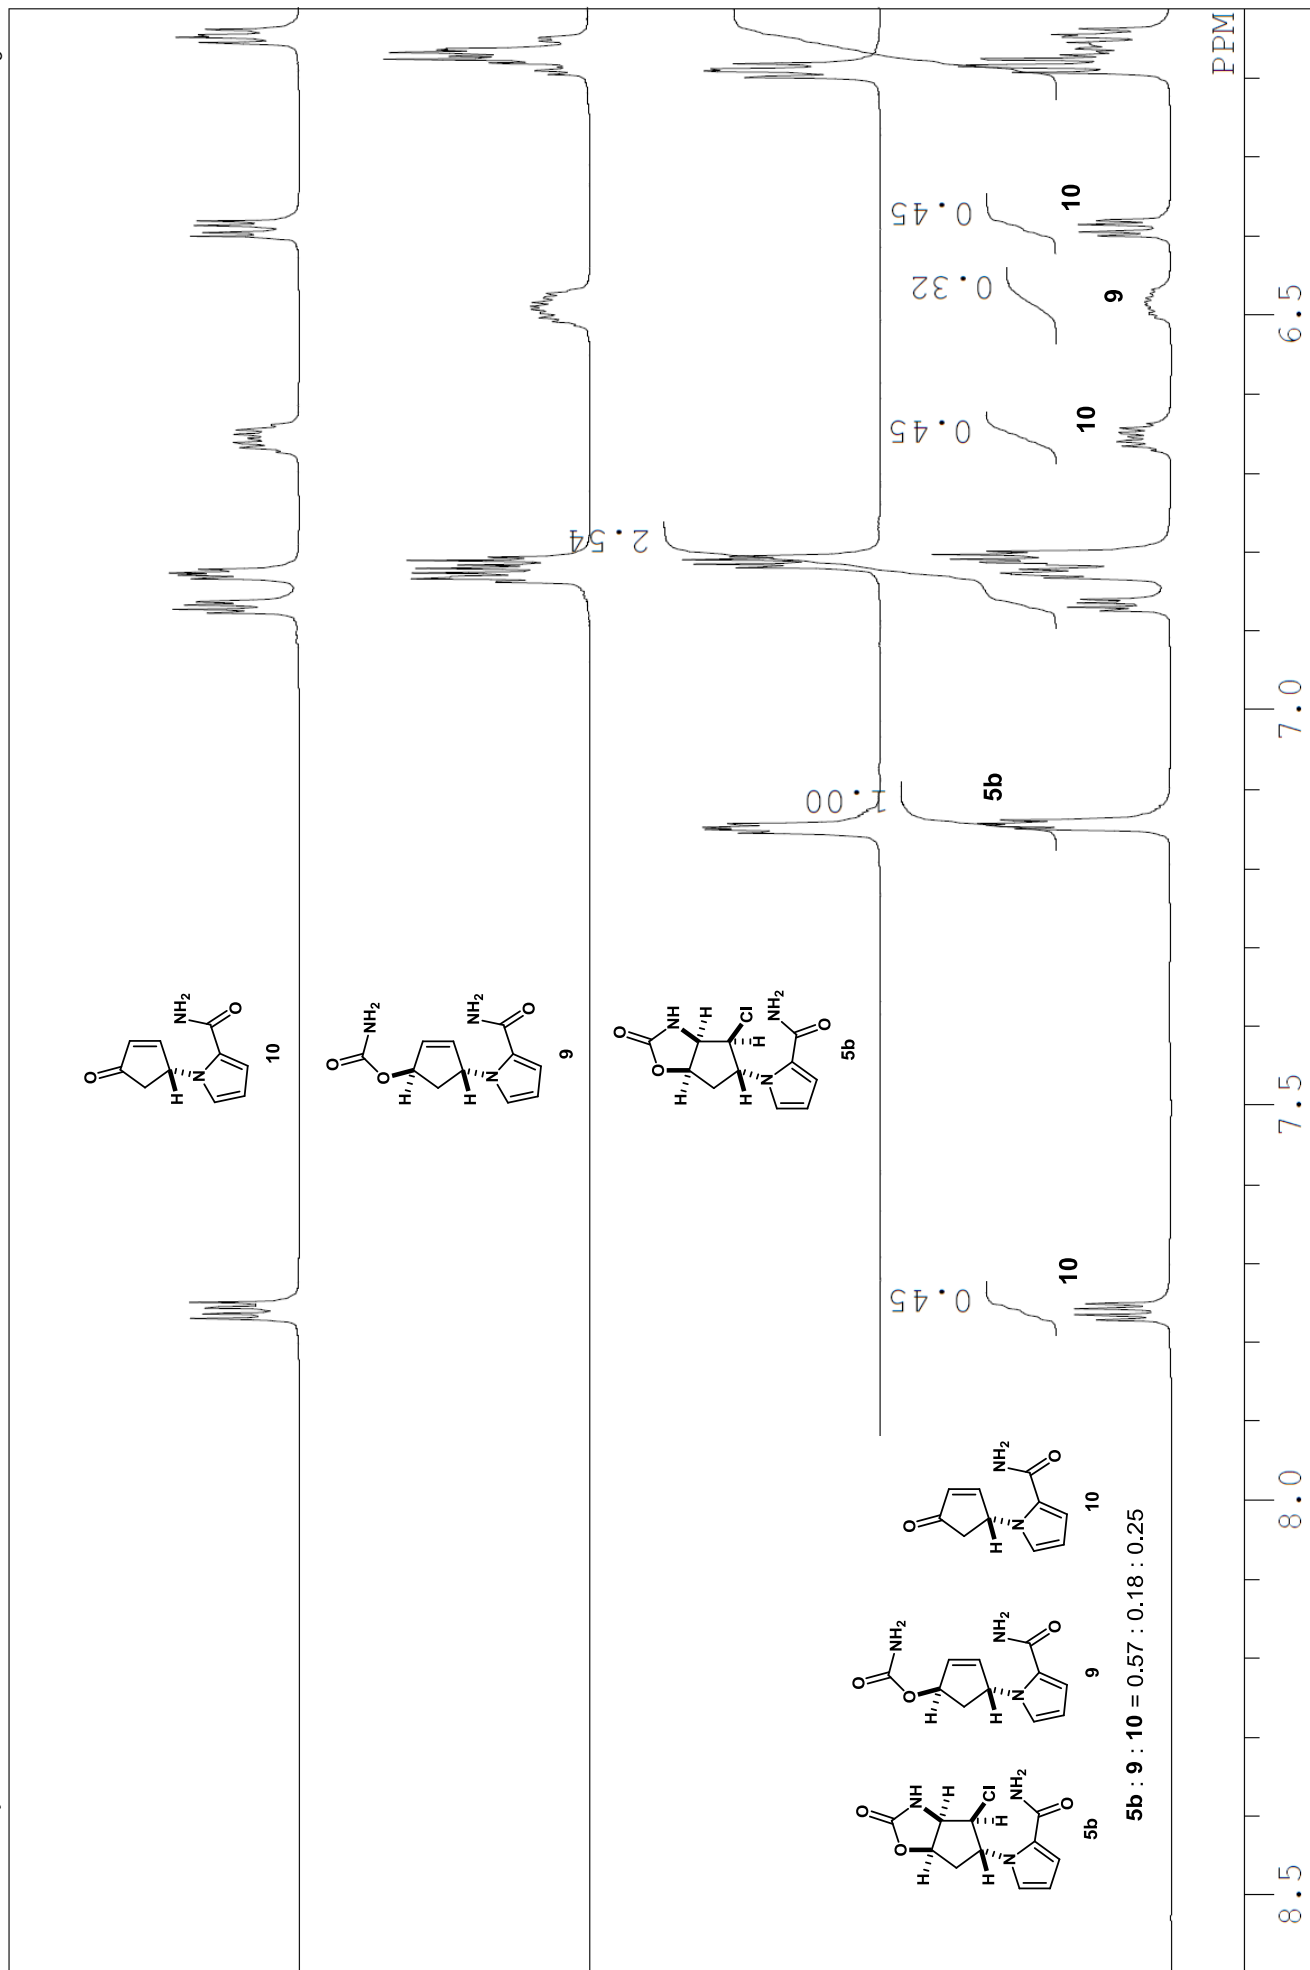

Table 1, entry 7

400MHz, CD<sub>3</sub>OD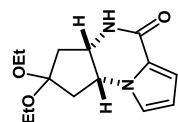

12

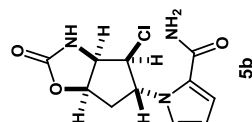

5b

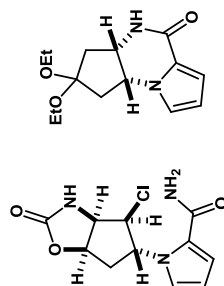

12

5b : 12 = 0.69 : 0.31

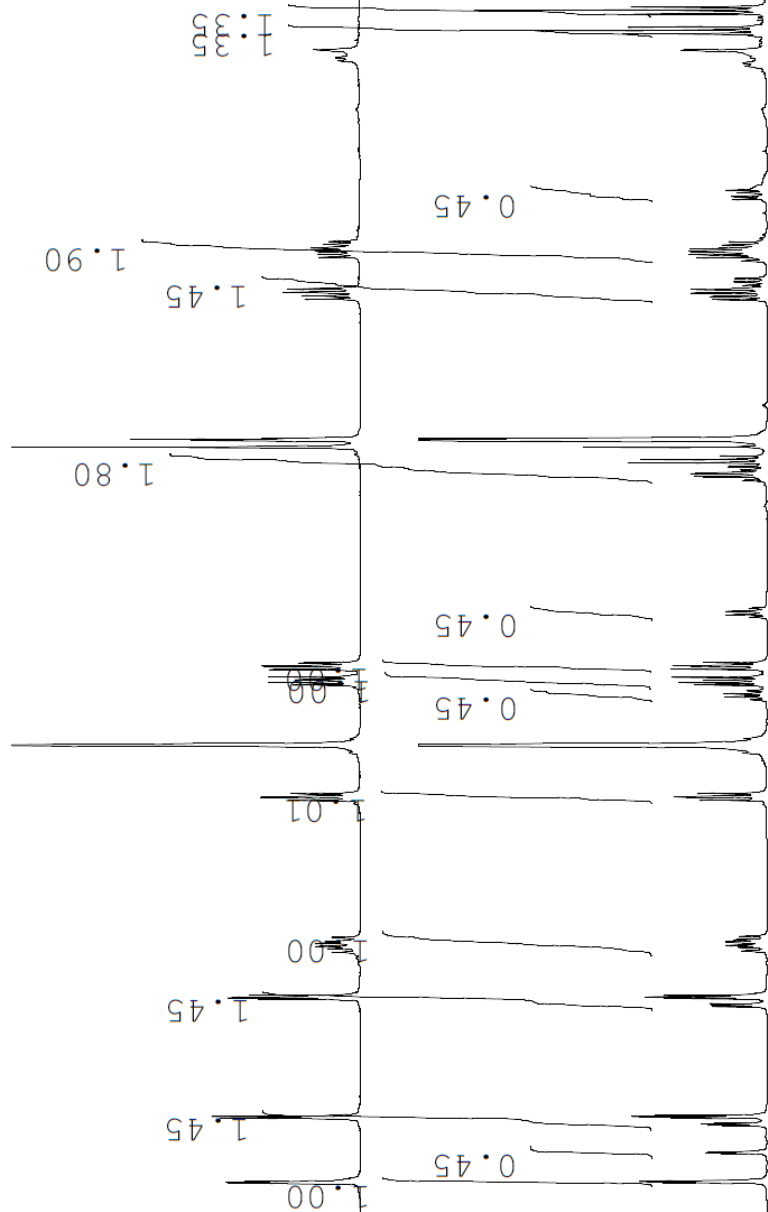

PPM

0

8

6

4

2

0

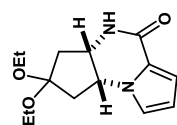

12

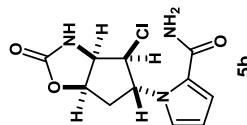

5b

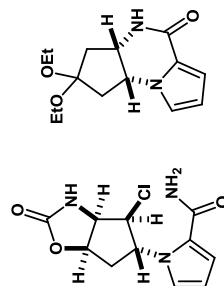

12

5b

5b : 12 = 0.69 : 0.31

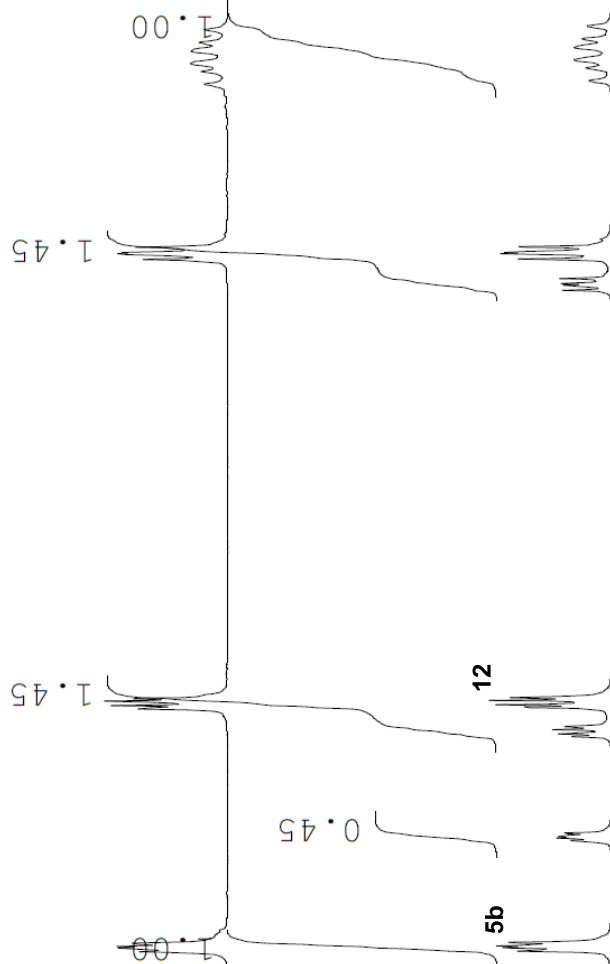

12

5b

PPM
